# Supplementary material
Source: PubMed Central journal article supplement (PMC6810645)

**Supplementary Table 1. Percentile scores for Modified Mini Mental State (3MS) examination scores stratified by age, education and gender, for Australian Whites (n=16,360).**

| Age, years       | Females |       |       |     |       |     | Males |       |       |     |      |     |
|------------------|---------|-------|-------|-----|-------|-----|-------|-------|-------|-----|------|-----|
|                  | 70-74   |       | 75-79 |     | 80+   |     | 70-74 |       | 75+   |     | 80+  |     |
| Education        | 0-12    | >12   | 0-12  | >12 | 0-12  | >12 | 0-12  | >12   | 0-12  | >12 | 0-12 | >12 |
| n                | 3,133   | 1,942 | 1,624 | 852 | 1,042 | 435 | 2,440 | 1,930 | 1,160 | 706 | 652  | 444 |
| <b>Total 3MS</b> |         |       |       |     |       |     |       |       |       |     |      |     |
| 100              | 100     | 100   | 100   | 100 | 100   | 100 | 100   | 100   | 100   | 100 | 100  | 100 |
| 99               | 96      | 91    | 97    | 94  | 98    | 93  | 98    | 95    | 99    | 96  | 98   | 98  |
| 98               | 90      | 77    | 92    | 84  | 95    | 88  | 95    | 87    | 96    | 91  | 96   | 94  |
| 97               | 90      | 62    | 84    | 73  | 89    | 78  | 89    | 76    | 92    | 81  | 93   | 87  |
| 96               | 69      | 48    | 75    | 61  | 82    | 67  | 80    | 63    | 86    | 71  | 89   | 79  |
| 95               | 58      | 37    | 65    | 49  | 74    | 57  | 71    | 51    | 78    | 60  | 83   | 70  |
| 94               | 46      | 28    | 54    | 39  | 65    | 48  | 62    | 40    | 69    | 50  | 76   | 59  |
| 93               | 37      | 20    | 44    | 31  | 57    | 39  | 53    | 31    | 59    | 42  | 67   | 50  |
| 92               | 30      | 15    | 37    | 24  | 50    | 30  | 45    | 23    | 50    | 33  | 60   | 42  |
| 91               | 23      | 11    | 29    | 18  | 42    | 24  | 36    | 19    | 42    | 26  | 52   | 36  |
| 90               | 18      | 7     | 23    | 14  | 35    | 20  | 30    | 13    | 36    | 19  | 45   | 30  |
| 89               | 14      | 5     | 18    | 11  | 27    | 16  | 24    | 9     | 29    | 15  | 37   | 25  |
| 88               | 11      | 4     | 14    | 8   | 23    | 12  | 19    | 7     | 25    | 11  | 33   | 21  |
| 87               | 8       | 2     | 11    | 6   | 19    | 10  | 15    | 5     | 20    | 8   | 27   | 15  |
| 86               | 6       | 1     | 8     | 4   | 15    | 7   | 12    | 3     | 16    | 6   | 22   | 11  |
| 85               | 5       | 1     | 6     | 4   | 11    | 5   | 9     | 3     | 13    | 4   | 17   | 8   |
| 84               | 3       | <1    | 5     | 3   | 9     | 5   | 7     | 2     | 10    | 3   | 13   | 5   |
| 83               | 2       | <1    | 4     | 2   | 7     | 4   | 5     | 1     | 8     | 2   | 9    | 4   |
| 82               | 1       | <1    | 3     | 1   | 6     | 3   | 3     | 1     | 6     | 2   | 7    | 2   |
| 81               | <1      | <1    | 2     | <1  | 4     | 1   | 2     | <1    | 4     | 1   | 4    | 1   |
| 80               | <1      | <1    | 1     | <1  | 3     | 1   | 1     | <1    | 2     | <1  | 3    | 1   |
| 79               | <1      | <1    | 1     | <1  | 1     |     | <1    | <1    | 1     | <1  | 1    | <1  |
| 78               | <1      | <1    | <1    |     | <1    | <1  | <1    | <1    | <1    | <1  | <1   | <1  |

Blank cells indicate no observations

**Supplementary Table 2. Percentile scores for Modified Mini Mental State (3MS) examination scores stratified by age, education and gender, for U.S Whites (n=1088).**

| Age, years       | Females |     |      |     | Males |     |      |     |
|------------------|---------|-----|------|-----|-------|-----|------|-----|
|                  | 70-74   |     | 75+  |     | 70-74 |     | 75+  |     |
| Education, years | 0-12    | >12 | 0-12 | >12 | 0-12  | >12 | 0-12 | >12 |
| <i>n</i>         | 56      | 273 | 88   | 324 | 29    | 132 | 31   | 155 |
| <b>3MS Score</b> |         |     |      |     |       |     |      |     |
| 100              | 100     | 100 | 100  | 100 | 100   | 100 |      | 100 |
| 99               | 94      | 84  | 95   | 87  | 96    | 92  | 100  | 94  |
| 98               | 80      | 66  | 87   | 71  | 89    | 72  | 90   | 79  |
| 97               | 69      | 52  | 77   | 56  | 82    | 59  | 83   | 72  |
| 96               | 60      | 32  | 64   | 46  | 72    | 46  | 77   | 60  |
| 95               | 53      | 23  | 51   | 34  | 62    | 34  | 74   | 52  |
| 94               | 33      | 17  | 38   | 26  | 58    | 28  | 67   | 42  |
| 93               | 30      | 14  | 32   | 20  | 51    | 24  | 58   | 36  |
| 92               | 21      | 10  | 27   | 16  | 34    | 16  | 54   | 29  |
| 91               | 19      | 8   | 15   | 12  | 20    | 12  | 45   | 25  |
| 90               | 16      | 6   | 11   | 8   |       | 8   | 38   | 20  |
| 89               | 14      | 3   | 10   | 6   |       |     |      | 15  |
| 88               | 10      | 3   | 9    | 5   |       |     | 32   | 11  |
| 87               | 7       | 2   | 7    | 4   |       | 5   | 19   | 9   |
| 86               |         |     |      | 3   | 17    | 3   | 12   | 4   |
| 85               | 3       | 1   | 6    |     | 10    | 3   | 6    | 3   |
| 84               |         |     | 5    | 2   | 6     |     | 3    | 2   |
| 83               |         |     | 4    | 1   |       | 1   |      | 1   |
| 82               |         |     |      | 1   |       |     |      | 1   |
| 81               |         | 1   | 3    | <1  | 3     |     |      | <1  |
| 80               |         |     |      | <1  |       |     |      |     |
| 79               |         | <1  | 2    | <1  |       |     |      |     |
| 78               |         |     | 1    |     |       |     |      |     |

Blank cells indicate no observations

**Supplementary Table 3. Percentile scores for Modified Mini Mental State (3MS) examination scores stratified by age, education and gender, for U.S African Americans (n=895).**

| Age, years       | Females |     |      |     | Males |     |      |     |
|------------------|---------|-----|------|-----|-------|-----|------|-----|
|                  | 65-69   |     | 70+  |     | 65-69 |     | 70+  |     |
| Education, years | 0-12    | >12 | 0-12 | >12 | 0-12  | >12 | 0-12 | >12 |
| <i>n</i>         | 64      | 183 | 106  | 240 | 54    | 101 | 61   | 86  |
| <b>3MS Score</b> |         |     |      |     |       |     |      |     |
| 100              | 100     | 100 | 100  | 100 |       | 100 | 100  |     |
| 99               | 98      | 95  |      | 97  | 100   | 97  |      | 100 |
| 98               | 95      | 86  | 98   | 92  | 98    | 89  | 98   | 95  |
| 97               | 90      | 78  | 95   | 85  | 96    | 82  | 95   | 90  |
| 96               | 89      | 68  | 91   | 76  | 92    | 74  | 91   | 84  |
| 95               | 79      | 55  | 83   | 69  | 88    | 64  | 90   | 77  |
| 94               | 70      | 46  | 75   | 59  | 77    | 53  | 83   | 66  |
| 93               | 62      | 38  | 70   | 48  | 59    | 44  | 77   | 54  |
| 92               | 56      | 30  | 64   | 40  | 46    | 29  | 70   | 45  |
| 91               | 51      | 22  | 59   | 34  | 38    | 25  | 65   | 36  |
| 90               | 42      | 19  | 54   | 27  | 33    | 17  | 60   | 32  |
| 89               | 28      | 14  | 44   | 24  | 31    | 14  | 52   | 27  |
| 88               | 18      | 7   | 34   | 20  | 25    | 10  | 44   | 19  |
| 87               | 14      | 4   | 31   | 16  | 22    | 9   | 40   | 12  |
| 86               | 12      |     | 29   | 14  | 16    | 7   | 36   | 10  |
| 85               | 10      | 3   | 22   | 12  | 12    |     | 32   | 8   |
| 84               | 9       | 2   | 19   | 8   |       | 5   | 22   | 6   |
| 83               | 6       | 1   | 16   | 6   |       | 3   | 16   |     |
| 82               | 4       |     | 14   | 4   | 11    |     | 13   | 4   |
| 81               | 3       |     | 11   | 2   | 7     | 2   | 11   | 2   |
| 80               |         |     | 8    | 1   | 3     | 1   | 4    |     |
| 79               |         |     | 4    | 1   | 1     |     | 3    |     |
| 78               | 1       | <1  | 2    | <1  |       |     |      |     |

**Supplementary Table 4. Percentile scores for Modified Mini Mental State (3MS) examination scores stratified by age, education and gender, for U.S Hispanic/Latinos (n=316).**

| Age, years       | Females |     |      |     | Males |     |      |     |
|------------------|---------|-----|------|-----|-------|-----|------|-----|
|                  | 65-69   |     | 70+  |     | 65-69 |     | 70+  |     |
| Education, years | 0-12    | >12 | 0-12 | >12 | 0-12  | >12 | 0-12 | >12 |
| <i>n</i>         | 47      | 37  | 79   | 32  | 28    | 23  | 37   | 33  |
| <b>3MS Score</b> |         |     |      |     |       |     |      |     |
| 100              | 100     | 100 | 100  | 100 | 100   |     |      |     |
| 99               | 97      | 94  | 98   | 96  |       | 100 |      | 100 |
| 98               | 95      | 81  | 97   |     | 96    | 91  | 100  | 93  |
| 97               | 93      | 75  |      | 90  | 85    | 78  | 97   | 78  |
| 96               | 89      | 62  | 92   | 84  | 82    | 65  | 89   | 69  |
| 95               |         | 48  | 87   | 75  |       | 47  | 83   | 63  |
| 94               | 82      | 32  | 82   | 56  | 71    | 43  | 75   | 54  |
| 93               | 74      | 24  | 77   | 40  | 64    | 39  | 67   | 42  |
| 92               | 65      |     | 72   |     |       |     | 59   | 39  |
| 91               | 55      | 21  | 70   | 28  | 57    |     | 56   | 30  |
| 90               | 42      | 16  | 62   |     | 46    | 17  | 54   | 21  |
| 89               | 40      | 10  | 50   | 21  | 35    | 13  | 51   | 18  |
| 88               | 36      | 8   | 45   | 18  | 32    |     | 48   | 12  |
| 87               | 27      | 5   | 36   | 15  | 21    | 8   | 43   |     |
| 86               | 19      |     | 32   |     |       |     | 37   |     |
| 85               | 14      |     |      | 12  | 17    | 4   | 35   | 9   |
| 84               | 8       |     | 25   |     |       |     |      |     |
| 83               | 6       |     | 22   | 9   | 14    |     | 27   | 6   |
| 82               |         |     | 18   |     | 7     |     | 21   |     |
| 81               |         |     | 11   | 6   |       |     | 18   |     |
| 80               |         |     | 6    | 3   | 3     |     |      |     |
| 79               |         |     | 5    |     |       |     | 13   |     |
| 78               |         | 2   | 2    |     |       |     | 8    | 3   |

**Supplementary Table 5: Exploratory factor analysis of the 15 items from the Modified Mini Mental State (3MS) examination, for Australian Whites (n=16,360)**

| <b>Factor</b> | <b>Eigenvalue</b> | <b>Difference</b> | <b>Proportion</b> | <b>Cumulative</b> |
|---------------|-------------------|-------------------|-------------------|-------------------|
| Factor 1      | 1.92              | 0.71              | 0.12              | 0.13              |
| Factor 2      | 1.20              | 0.13              | 0.080             | 0.21              |
| Factor 3      | 1.07              | 0.05              | 0.072             | 0.28              |
| Factor 4      | 1.02              | 0.02              | 0.068             | 0.35              |
| Factor 5      | 1.00              | 0.007             | 0.067             | 0.41              |
| Factor 6      | 0.99              | 0.01              | 0.066             | 0.48              |
| Factor 7      | 0.98              | 0.01              | 0.066             | 0.55              |
| Factor 8      | 0.97              | 0.02              | 0.065             | 0.61              |
| Factor 9      | 0.95              | 0.004             | 0.064             | 0.67              |
| Factor 10     | 0.95              | 0.04              | 0.063             | 0.74              |
| Factor 11     | 0.91              | 0.01              | 0.061             | 0.80              |
| Factor 12     | 0.90              | 0.08              | 0.060             | 0.86              |
| Factor 13     | 0.82              | 0.04              | 0.055             | 0.91              |
| Factor 14     | 0.78              | 0.25              | 0.052             | 0.97              |
| Factor 15     | 0.53              | -                 | 0.035             | 1.0               |

Likelihood-ratio test of independence against the saturated model: chi-square (105) = 8372.14, p<0.0001

**Supplementary Table 6: Four-factor solution to exploratory analysis<sup>a</sup> of the 15 items from the Modified Mini Mental State (3MS) examination, for Australian Whites (n=16,360)**

| <b>Item</b>                 | <b><u>Factor1</u><br/>Verbal episodic<br/>memory</b> | <b><u>Factor2</u><br/>Language &amp;<br/>Executive<br/>Function</b> | <b><u>Factor3</u><br/>Psychomotor &amp;<br/>Working<br/>memory</b> | <b><u>Factor4</u><br/>Orientation &amp; Visuo-<br/>construction</b> | <b>Uniqueness</b> |
|-----------------------------|------------------------------------------------------|---------------------------------------------------------------------|--------------------------------------------------------------------|---------------------------------------------------------------------|-------------------|
| First recall                | <b>0.83</b>                                          | 0.01                                                                | -0.02                                                              | -0.004                                                              | 0.32              |
| Second recall               | <b>0.82</b>                                          | 0.05                                                                | 0.07                                                               | 0.009                                                               | 0.32              |
| Naming                      | 0.02                                                 | <b>0.49</b>                                                         | 0.26                                                               | -0.21                                                               | 0.72              |
| Read and obey               | 0.01                                                 | <b>0.47</b>                                                         | -0.11                                                              | -0.10                                                               | 0.74              |
| Repetition                  | 0.10                                                 | <b>0.45</b>                                                         | 0.15                                                               | 0.05                                                                | 0.74              |
| Three-stage command         | 0.01                                                 | <b>0.43</b>                                                         | -0.22                                                              | 0.06                                                                | 0.75              |
| Similarities                | 0.25                                                 | <b>0.43</b>                                                         | 0.30                                                               | 0.14                                                                | 0.66              |
| Four-legged animals         | 0.25                                                 | 0.38 <sup>b</sup>                                                   | 0.12                                                               | 0.01                                                                | 0.78              |
| Writing                     | -0.05                                                | 0.11                                                                | <b>0.69</b>                                                        | -0.05                                                               | 0.52              |
| Mental reversal             | 0.15                                                 | -0.04                                                               | <b>0.66</b>                                                        | 0.05                                                                | 0.54              |
| Place & date of birth       | 0.02                                                 | -0.12                                                               | -0.05                                                              | <b>0.66</b>                                                         | 0.47              |
| Spatial Orientation         | 0.03                                                 | 0.29                                                                | -0.04                                                              | <b>0.49</b>                                                         | 0.73              |
| Copying pentagons           | -0.10                                                | 0.18                                                                | 0.22                                                               | <b>0.43</b>                                                         | 0.75              |
| Registration                | -0.10                                                | 0.02                                                                | -0.10                                                              | 0.21                                                                | 0.88              |
| Temporal Orientation        | 0.22                                                 | 0.01                                                                | 0.07                                                               | 0.26                                                                | 0.85              |
| <b>% Variance explained</b> | <b>12.4</b>                                          | <b>8.0</b>                                                          | <b>7.2</b>                                                         | <b>6.8</b>                                                          | <b>34.4</b>       |

<sup>a</sup>Numbers in bold represent factor loadings  $\geq 0.40$ . <sup>a</sup>Using an orthogonal rotation. <sup>b</sup>Four-legged animals loaded strongly on Factor 2 (0.38) although fell short of this cut-off.

**Supplementary Table 7: Four-factor solution to exploratory analysis<sup>a</sup> of the 15 items from the Modified Mini Mental State (3MS) examination, for Australian Whites (n=16,360)**

| <b>Item</b>                 | <b>Factor1</b><br><b>Verbal episodic</b><br><b>memory</b> | <b>Factor2</b><br><b>Language &amp;</b><br><b>Executive</b><br><b>Function</b> | <b>Factor3</b><br><b>Psychomotor &amp;</b><br><b>Working</b><br><b>memory</b> | <b>Factor4</b><br><b>Orientation &amp; Visuo-</b><br><b>construction</b> | <b>Uniqueness</b> |
|-----------------------------|-----------------------------------------------------------|--------------------------------------------------------------------------------|-------------------------------------------------------------------------------|--------------------------------------------------------------------------|-------------------|
| First recall                | <b>0.84</b>                                               | 0.004                                                                          | -0.08                                                                         | -0.02                                                                    | 0.32              |
| Second recall               | <b>0.82</b>                                               | 0.04                                                                           | 0.003                                                                         | -0.01                                                                    | 0.32              |
| Naming                      | -0.05                                                     | <b>0.41</b>                                                                    | 0.24                                                                          | -0.24                                                                    | 0.72              |
| Read and obey               | -0.03                                                     | <b>0.51</b>                                                                    | -0.16                                                                         | -0.13                                                                    | 0.74              |
| Repetition                  | 0.10                                                      | <b>0.45</b>                                                                    | 0.15                                                                          | 0.05                                                                     | 0.74              |
| Three-stage command         | 0.03                                                      | <b>0.48</b>                                                                    | -0.26                                                                         | 0.02                                                                     | 0.75              |
| Similarities                | 0.16                                                      | <b>0.39</b>                                                                    | 0.25                                                                          | 0.08                                                                     | 0.66              |
| Four-legged animals         | 0.20                                                      | <i>0.36<sup>b</sup></i>                                                        | 0.11                                                                          | -0.04                                                                    | 0.78              |
| Writing                     | -0.14                                                     | 0.04                                                                           | <b>0.70</b>                                                                   | -0.07                                                                    | 0.52              |
| Mental reversal             | 0.08                                                      | -0.09                                                                          | <b>0.67</b>                                                                   | 0.03                                                                     | 0.54              |
| Place & date of birth       | -0.006                                                    | -0.12                                                                          | -0.05                                                                         | <b>0.73</b>                                                              | 0.47              |
| Spatial Orientation         | -0.03                                                     | 0.26                                                                           | -0.09                                                                         | <b>0.42</b>                                                              | 0.73              |
| Copying pentagons           | -0.15                                                     | 0.08                                                                           | 0.23                                                                          | <b>0.39</b>                                                              | 0.75              |
| Registration                | -0.12                                                     | 0.27                                                                           | -0.13                                                                         | 0.15                                                                     | 0.88              |
| Temporal Orientation        | 0.22                                                      | -0.06                                                                          | 0.05                                                                          | 0.31                                                                     | 0.85              |
| <b>% Variance explained</b> | <b>12.7</b>                                               | <b>8.0</b>                                                                     | <b>7.2</b>                                                                    | <b>6.8</b>                                                               | <b>34.4</b>       |

<sup>a</sup>Numbers in bold represent factor loadings  $\geq 0.40$ . <sup>a</sup>Using an oblique rotation. <sup>b</sup>Four-legged animals loaded strongly on Factor 2 (0.36) although fell short of this cut-off.

**Supplementary Figure 1: The scree plot for the exploratory factor analysis of the 15 items on the 3MS in Australian white participants (n=16,360). 3MS: Modified Mini Mental State examination.**

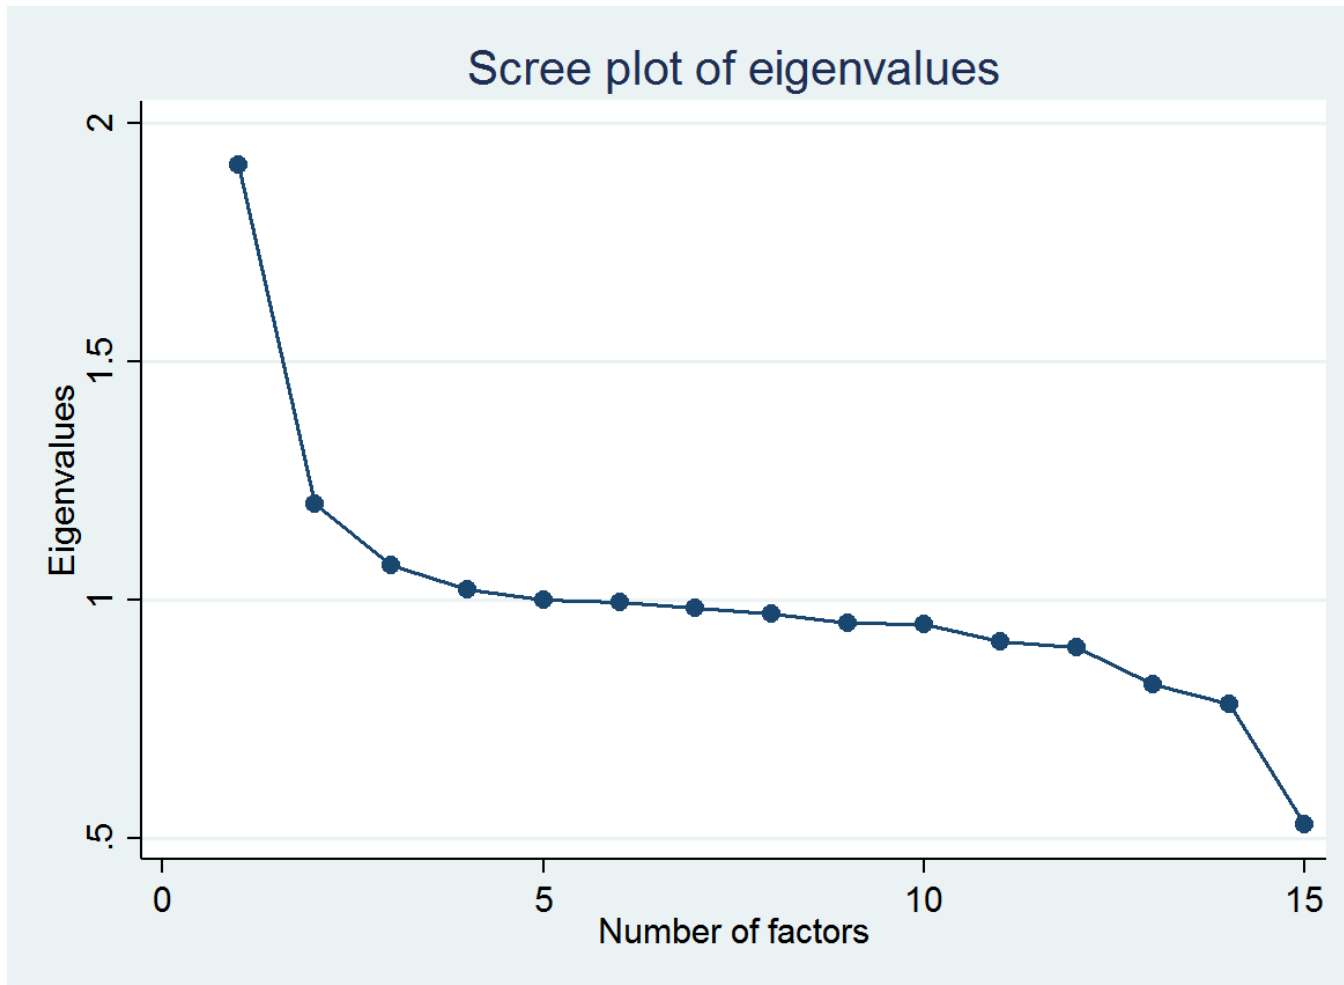

Supplement: NIHMS1051544-supplement-Supplementary.pdf [file NIHMS1051544-supplement-Supplementary.pdf]
